# Supplementary material for: A triphenylamine functionalized photosensitizer as a promising candidate for osteosarcoma cancer phototheranostics
Source: Royal Society of Chemistry journal article supplement (doi:10.1039/d3ma00835e), 2024-01-01

## Supplementary Material

### Triphenylamine functionalized photosensitizer as a promising candidate for osteosarcoma cancer phototheranostics

Chongchong Yin<sup>1</sup>, Xiaowen Bao<sup>2</sup>, Jiaqi Li<sup>2</sup>, Jianwei Zhu<sup>2</sup>, Jisheng Sui<sup>1,\*</sup>

\* Correspondence: Jisheng Sui, Email: [suijisheng@njmu.edu.cn](mailto:suijisheng@njmu.edu.cn).

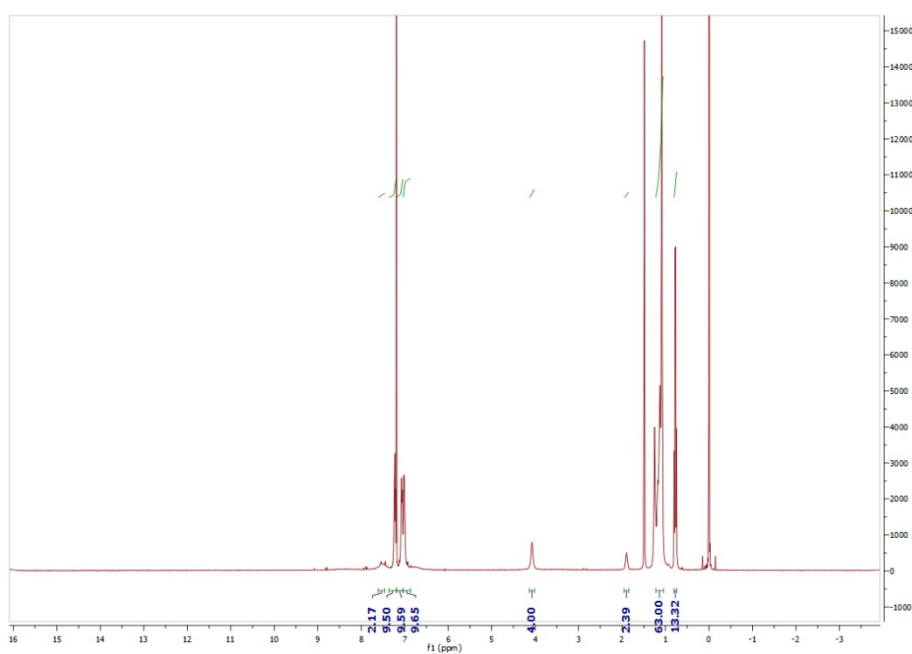

#### Supplementary Figures

Fig. S1 <sup>1</sup>H NMR of DPPTPA in CDCl<sub>3</sub>.

Fig. S2 TUNEL assay

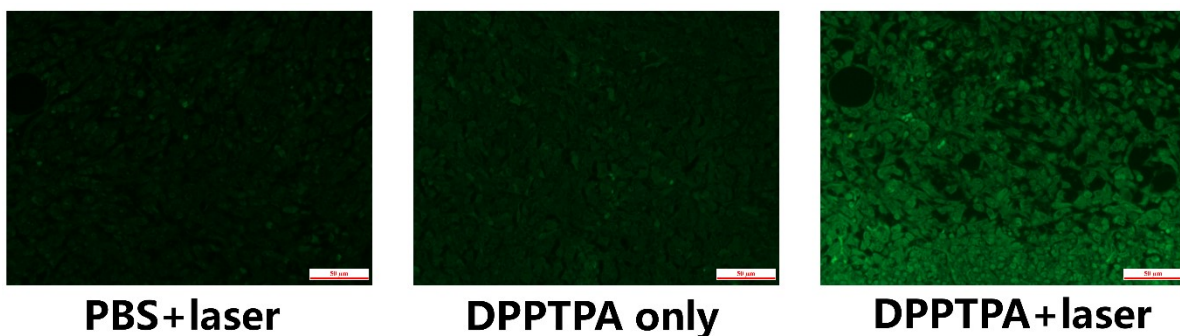

Supplement: d3ma00835e1.pdf [file d3ma00835e1.pdf]
